# Supplementary material for: Brief communication: Small-scale geohazards cause significant and highly variable impacts on emotions
Source: Copernicus journal article supplement (doi:10.5194/nhess-2023-6), 2023-04-17
Supplement: Supplementary file [file nhess-2023-6-AC1-supplement.pdf]

| Label    | Label certainty | Earthquake (E) or Volcano (V) keywords | Timestamp        | Original tweet (Icelandic)                                                                                                                                                                                                 | English translation                                                                                                                                                                                                                                        |
|----------|-----------------|----------------------------------------|------------------|----------------------------------------------------------------------------------------------------------------------------------------------------------------------------------------------------------------------------|------------------------------------------------------------------------------------------------------------------------------------------------------------------------------------------------------------------------------------------------------------|
| Neutral  | Clear           | E                                      | 21/06/2020 08:15 | Stóru skjálftarnir í gær voru 5,4 og 5,6 á stærð                                                                                                                                                                           | The large earthquakes yesterday were magnitude 5.4 and 5.6                                                                                                                                                                                                 |
| Negative | Clear           | E                                      | 26/02/2021 12:55 | Mér var kippt undan fallandi vegg í 17.júní skjálftanum 2000 og fékk bókahillu yfir mig í skjálftanum 3 dögum seinna. Var 5 ára Er búin að titra og gráta við hvern skjálfta síðustu daga, áföll eru áhugaverður andskoti. | I got rescued from a collapsing wall in the 17 June 2000 earthquake and was hit by a bookshelf in the earthquake 3 days later. I was 5 years old. I have been shaking and crying after each earthquake in the last days, traumas are an interesting demon. |
| Negative | Clear           | E                                      | 24/02/2021 12:18 | Að sitja heima hjá mér í panikki eftir stóran skjálfta og vita ekki hvort ég sé að upplifa eftirskjálfta, kvíðaskjálfta í líkamanum eða hvort barnið í leginu á mér sé á svona mikilli hreyfingu að ég hrisstist er með    | Sitting at home in a panic after a large earthquake and not knowing if I'm experiencing an aftershock, anxiety shakes in my body, or whether the baby in my uterus is moving so much that I'm shaking is among the top 5 weirdest                          |

|          |       |   |                     |                                                                                                                                                                                             |                                                                                                                                                                                                             |
|----------|-------|---|---------------------|---------------------------------------------------------------------------------------------------------------------------------------------------------------------------------------------|-------------------------------------------------------------------------------------------------------------------------------------------------------------------------------------------------------------|
|          |       |   |                     | top 5 því skrítnasta sem ég hef upplifað.                                                                                                                                                   | experiences of my life.                                                                                                                                                                                     |
| Negative | Clear | V | 19/03/2021<br>12:14 | Er ég ein um að finnast ekkert spennandi við eldgos á þessum slóðum og kvíða því frekar hversu stórt það verður og hversu lengi og mun það hafa áhrif á samgöngur og og og smá kvíði hérna. | Am I the only one who is not excited about an eruption in this location and feeling anxious over how large it will be and for how long, and if it will impact transport and and and a bit anxious over here |
| Negative | Clear | V | 19/03/2021<br>12:19 | Hve vitlaust getur fólk verið. Gos og allir keyra í fangið á gosinu og ganga síðasta spilinn upp á gígjinn                                                                                  | How stupid can people be. [There is] an eruption and everyone is driving straight towards it and walking up to the crater                                                                                   |
| Positive | Clear | E | 20/10/2020<br>14:02 | Ég var með fulla stofu af 9. bekkjum á þessum stað í námsefninu þegar skjálftinn reið yfir. Nemendur hlógu og skríktu eins og í tívolítæki og vildu meira. Það sýnishornið.                 | I had a full classroom of 9th graders at this point in the curriculum when the earthquake struck. The pupils laughed and squealed like on a funfair ride and wanted more. What a point of view.             |
| Positive | Clear | E | 24/02/2021<br>11:53 | Finnst ég vera í minnihlutahópi sem hamfaraperri. Sit í sófa í vinnunni,                                                                                                                    | I feel that I'm in a minority group as a disaster fetishist. Sitting on the sofa at                                                                                                                         |

|          |       |   |                  |                                                                                                                                                                                                                                |                                                                                                                                                                                                                                                                                             |
|----------|-------|---|------------------|--------------------------------------------------------------------------------------------------------------------------------------------------------------------------------------------------------------------------------|---------------------------------------------------------------------------------------------------------------------------------------------------------------------------------------------------------------------------------------------------------------------------------------------|
|          |       |   |                  | <p>óvinnufær útaf tryllings spennu yfir næstu skjálftum!</p> <p>Sendi pabba skilaboð (fellow hamfaraperri), hann er í Hörpu, þar nörtrar allt gler og Sinfóæfingu var hætt! Sorry ef þetta triggerar eh en þvilík veisla!!</p> | <p>work, unable to work because of extreme excitement over earthquakes!</p> <p>Messaging my dad (a fellow disaster fetishist), he is at Harpa [concert hall], all glass panes are shaking there and the Symphony stopped their practice! Sorry if this is triggering but what a feast!!</p> |
| Positive | Clear | V | 12/04/2021 23:46 | <p>Gosið er svo mikið æði, líka í annað skipti. Ótrúlegt að sjá gígana fjóra. Svo mikil upplifun. Dýrka líka að sjá alls konar fólk þarna að njóta útivistar og náttúru.</p>                                                   | <p>The eruption is wonderful, including on a second visit. Unbelievable to see the four craters. Such a huge experience. I also adore seeing all kinds of people there enjoying the outdoors and nature.</p>                                                                                |
| Positive | Clear | V | 12/05/2021 23:24 | <p>Var í Öskjuhlíðinni að skoða stíga og fugla og kanínur með litlu í kvöld. Varð litið í átt til gossins, sá feikiháan gosstrók, skærappelsínugulan . Þetta er svo flott!</p>                                                 | <p>Was at Öskjuhlíð &lt;park in Reykjavik&gt; tonight with my little one exploring the trails, birds and bunnies. Looked up towards the eruption, saw an extremely high</p>                                                                                                                 |

|          |                                                                                                              |   |                      |                                                                                                                                                                                                                                               |                                                                                                                                                                                                                                                                            |
|----------|--------------------------------------------------------------------------------------------------------------|---|----------------------|-----------------------------------------------------------------------------------------------------------------------------------------------------------------------------------------------------------------------------------------------|----------------------------------------------------------------------------------------------------------------------------------------------------------------------------------------------------------------------------------------------------------------------------|
|          |                                                                                                              |   |                      |                                                                                                                                                                                                                                               | eruption fountain, bright orange. It was so beautiful!                                                                                                                                                                                                                     |
| Neutral  | Ambiguous<br>- could be positive                                                                             | V | 14/04/202<br>1 11:54 | Langar þig að skoða hvernig eldgosið við Fagradalsfjall hefur þróast og hraunið breitt úr sér? Náttúrufræðistofnun Íslands hefur í samstarfi við Háskóla Íslands, almannavarnir og Landmælingar Íslands útbúið glæsileg þrívíddarkort af því. | Would you like to see how the Fagradalsfjall eruption has evolved and the lava extended? The Iceland Institute of Natural History in collaboration with the University of Iceland, civil protection and National Land survey of Iceland has published a remarkable 3D map. |
| Negative | Ambiguous, use of humour. Negative sentiment addressed at the radio interviewee, rather than at the eruption | V | 08/09/202<br>1 07:42 | Það er maður í útvarpinu mínu að kvarta yfir því að það hafi komið covid og eldgos því það hafið séð til þess að það væri ekki rædd pólitík í vor.                                                                                            | There is a man on the radio complaining that covid and the eruption prevented political debates this spring.                                                                                                                                                               |
| Negative | Ambiguous, use of sarcasm                                                                                    | V | 15/04/202<br>1 18:36 | Þetta eldgos er nú orðið svoldið þreytt, er ekki hægt að fara fá eitthvað                                                                                                                                                                     | This eruption is becoming a bit tired, can't we get some proper excitement,                                                                                                                                                                                                |

|           |                                                                                        |   |                  |                                                                                                                                                         |                                                                                                                                                                                |
|-----------|----------------------------------------------------------------------------------------|---|------------------|---------------------------------------------------------------------------------------------------------------------------------------------------------|--------------------------------------------------------------------------------------------------------------------------------------------------------------------------------|
|           |                                                                                        |   |                  | almennilegt fútt í þetta, loftstein eða eitthvað?                                                                                                       | like a meteorite or something?                                                                                                                                                 |
| Negative. | Ambiguous. Negative sentiment addressed to covid-19 restrictions. Labelled Negative    | V | 13/04/2021 14:13 | Þúsund manns að horfa á eldgos og 100 manns í leikhúsi en enginn fær að horfa á kappleiki í sporti. Hvað er í gangi ??????????                          | Thousand people watching an eruption and 100 people in the theatre, but noone is allowed to watch [live] sports matches. What is going on?????????????                         |
| Negative  | Ambiguous, use of humour                                                               | V | 05/07/2021 23:14 | ekki farið og séð gosið, ekki farið í sky lagoon... instagram fer að loka á aðganginn minn 😬😬. Spurning hvort ferðini í stuðlagil 2020 lengi aðeinsíðví | not been to see the eruption, not been to sky lagoon... instagram is going to be closing my instagram account 😬😬. Wonder if my trip to Stuðlagil in 2020 is extending it a bit |
| Positive  | Ambiguous. Positive sentiment refers to the prime minister, rather than the earthquake | E | 20/10/2020 14:10 | Forsætisráðherra heldur kúlinu þegar skjálftinn kemur í beinni.                                                                                         | The prime minister remains cool when the earthquake strikes during live interview.                                                                                             |
